# Supplementary material
Source: PubMed Central journal article supplement (PMC10227870)
Supplement: NIHMS1897713-supplement-Supplementary_Figures.pdf [file NIHMS1897713-supplement-Supplementary_Figures.pdf]

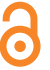

---

# **Tau activation of microglial cGAS–IFN reduces MEF2C-mediated cognitive resilience**

---

In the format provided by the  
authors and unedited

**Supplementary Figure 1. Mouse hippocampi single nuclei isolation and RNA sequencing quality control (Related to Figures 3 and 5)**

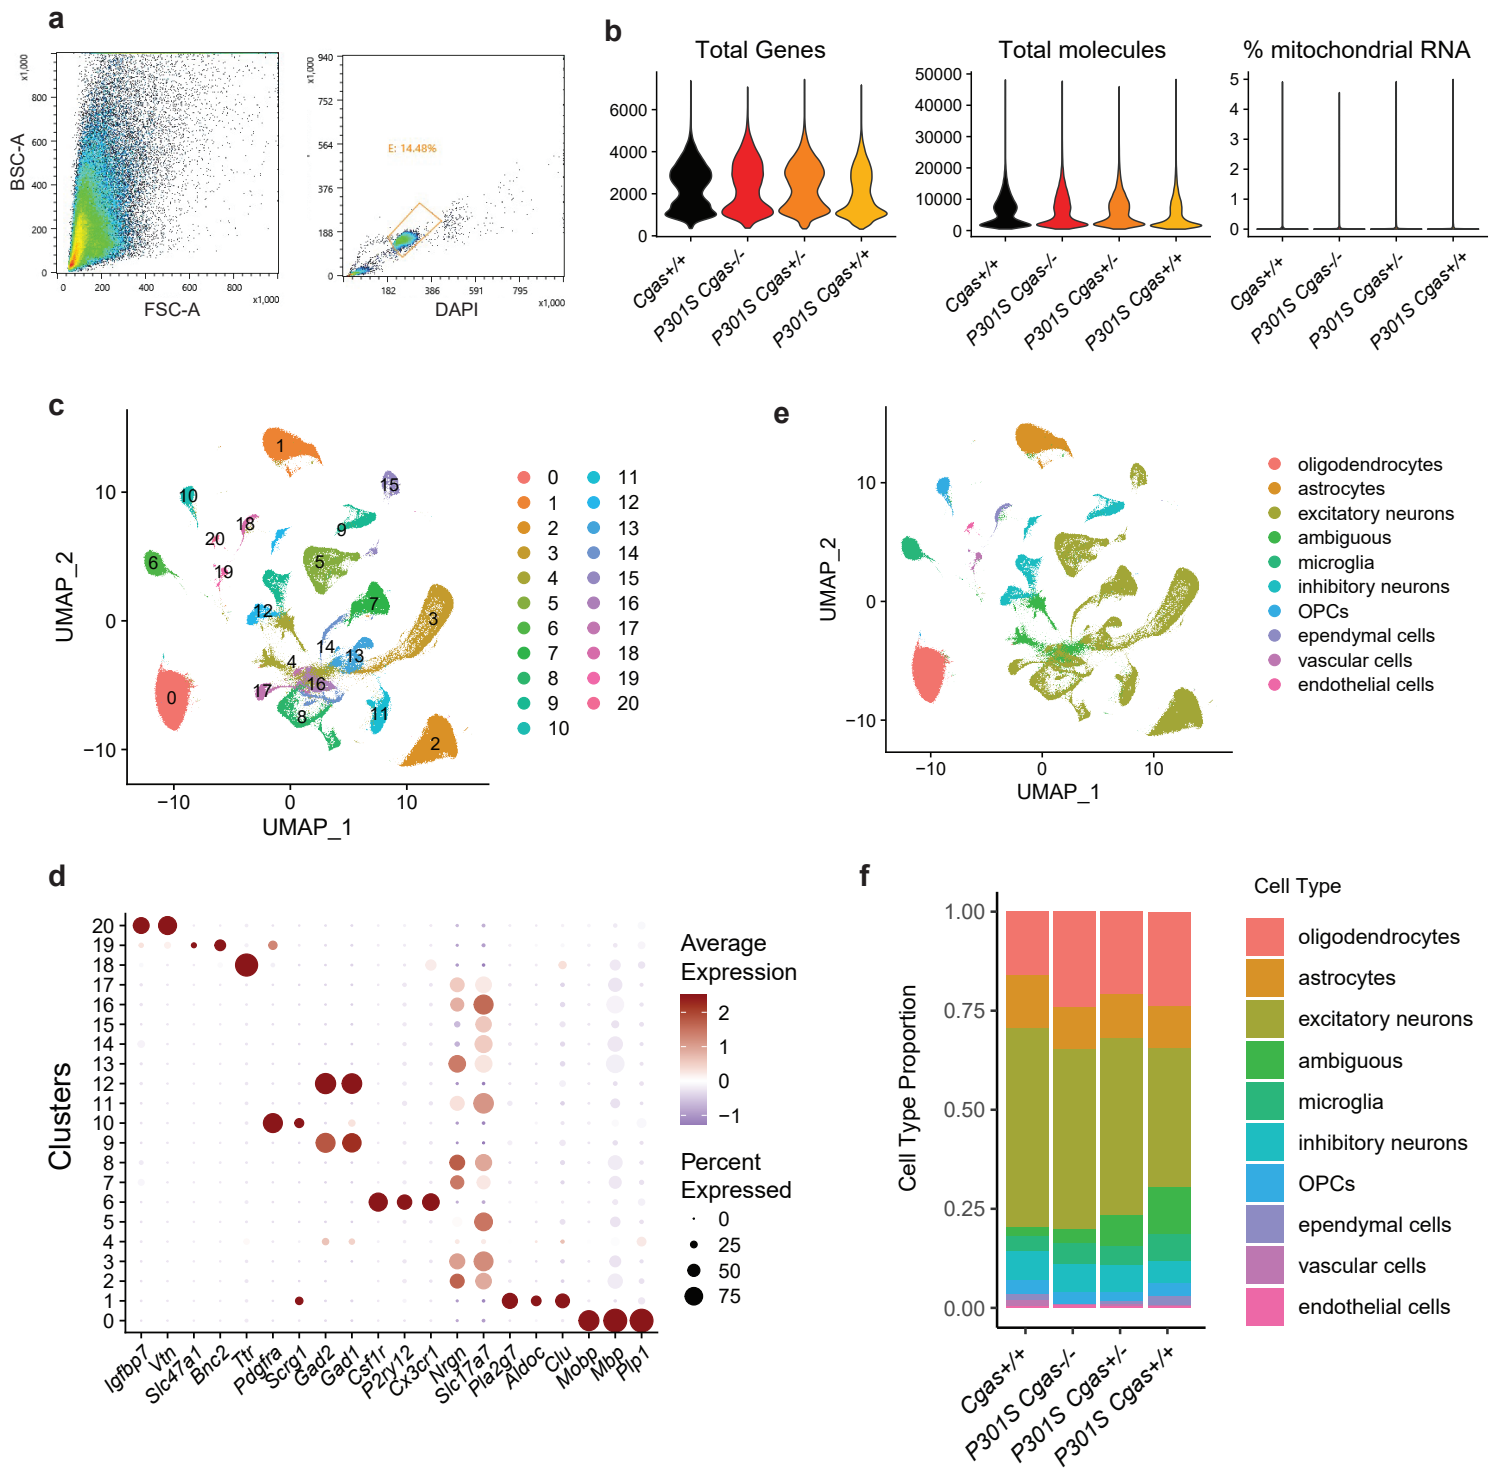

**Supplementary Figure 1 | Mouse hippocampi single nuclei isolation and RNA sequencing quality control (Related to Figures 3 and 5).** **a.** Representative FACS plot showing gating strategy used for collection of DAPI-labeled hippocampal nuclei (gate E, orange) after mechanical dounce homogenization. n=6 (3 males, 3 females) per genotype. **b.** Quality-control plots showing equivalent amounts of total number of genes, total number of molecules and percent mitochondrial RNA in nuclei used for downstream analyses. **c.** UMAP dimensional plot showing nuclei colored according to transcriptionally distinct cell clusters identified using Seurat package. **d.** Summary of genes used for cluster classification into different cell types. **e.** UMAP plot showing clusters with assigned cell type based in marker expression in (d). **f.** Proportion of each cell type detected across the different genotypes.

## Supplementary Figure 2. Quality-control Assessment of snRNA-seq of Control and DMXAA treated WT and *Ifnar1*<sup>-/-</sup> mice. (Related to Figure 6)

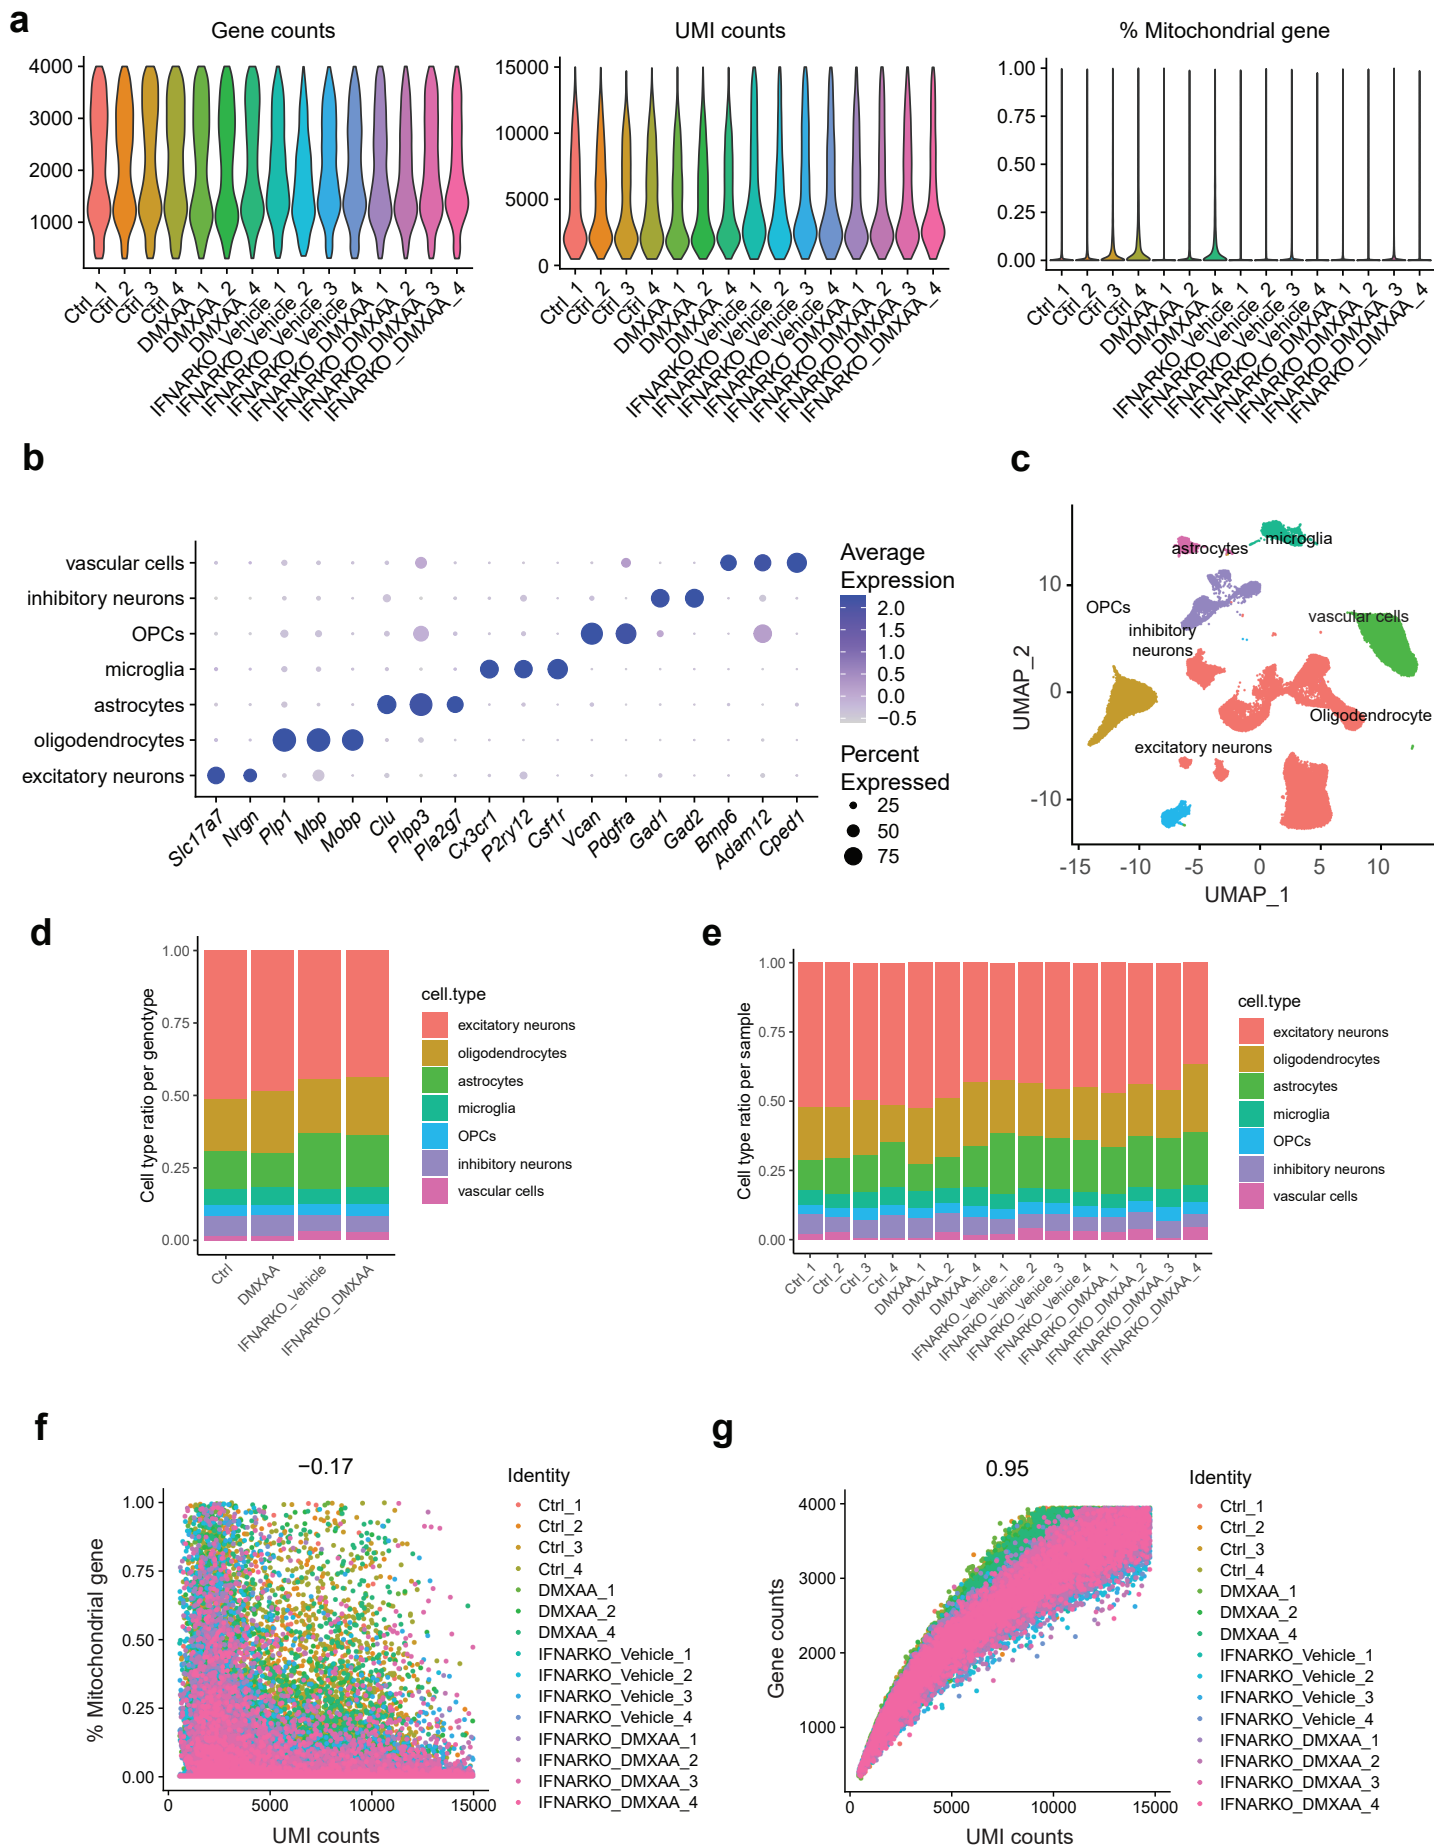

**Supplementary Figure 2 | Quality-control Assessment of snRNA-seq of control and DMXAA treated WT and *Ifnar1*<sup>-/-</sup> mice. (Related to Figure 6).** **a.** Quality-control plots showing equivalent amounts of total number of genes, total number of molecules, and percent mitochondrial RNA in nuclei used for downstream analyses. **b.** Summary of genes used for cluster classification into different cell types. **c.** UMAP dimensional plot showing nuclei colored according to transcriptionally distinct cell clusters identified using Seurat package. **d.** Proportion of each cell type detected across the different genotypes. **e.** Proportion of each cell type detected across the different samples. **f–g.** Correlation between UMI counts and percentage of mitochondrial genes per nuclei (f) and total genes detected (g) for all samples.

**Supplementary Figure 3. Quality-control of snRNA-seq of P301S hippocampi treated with TDI-6570 (Related to Figure 7)**

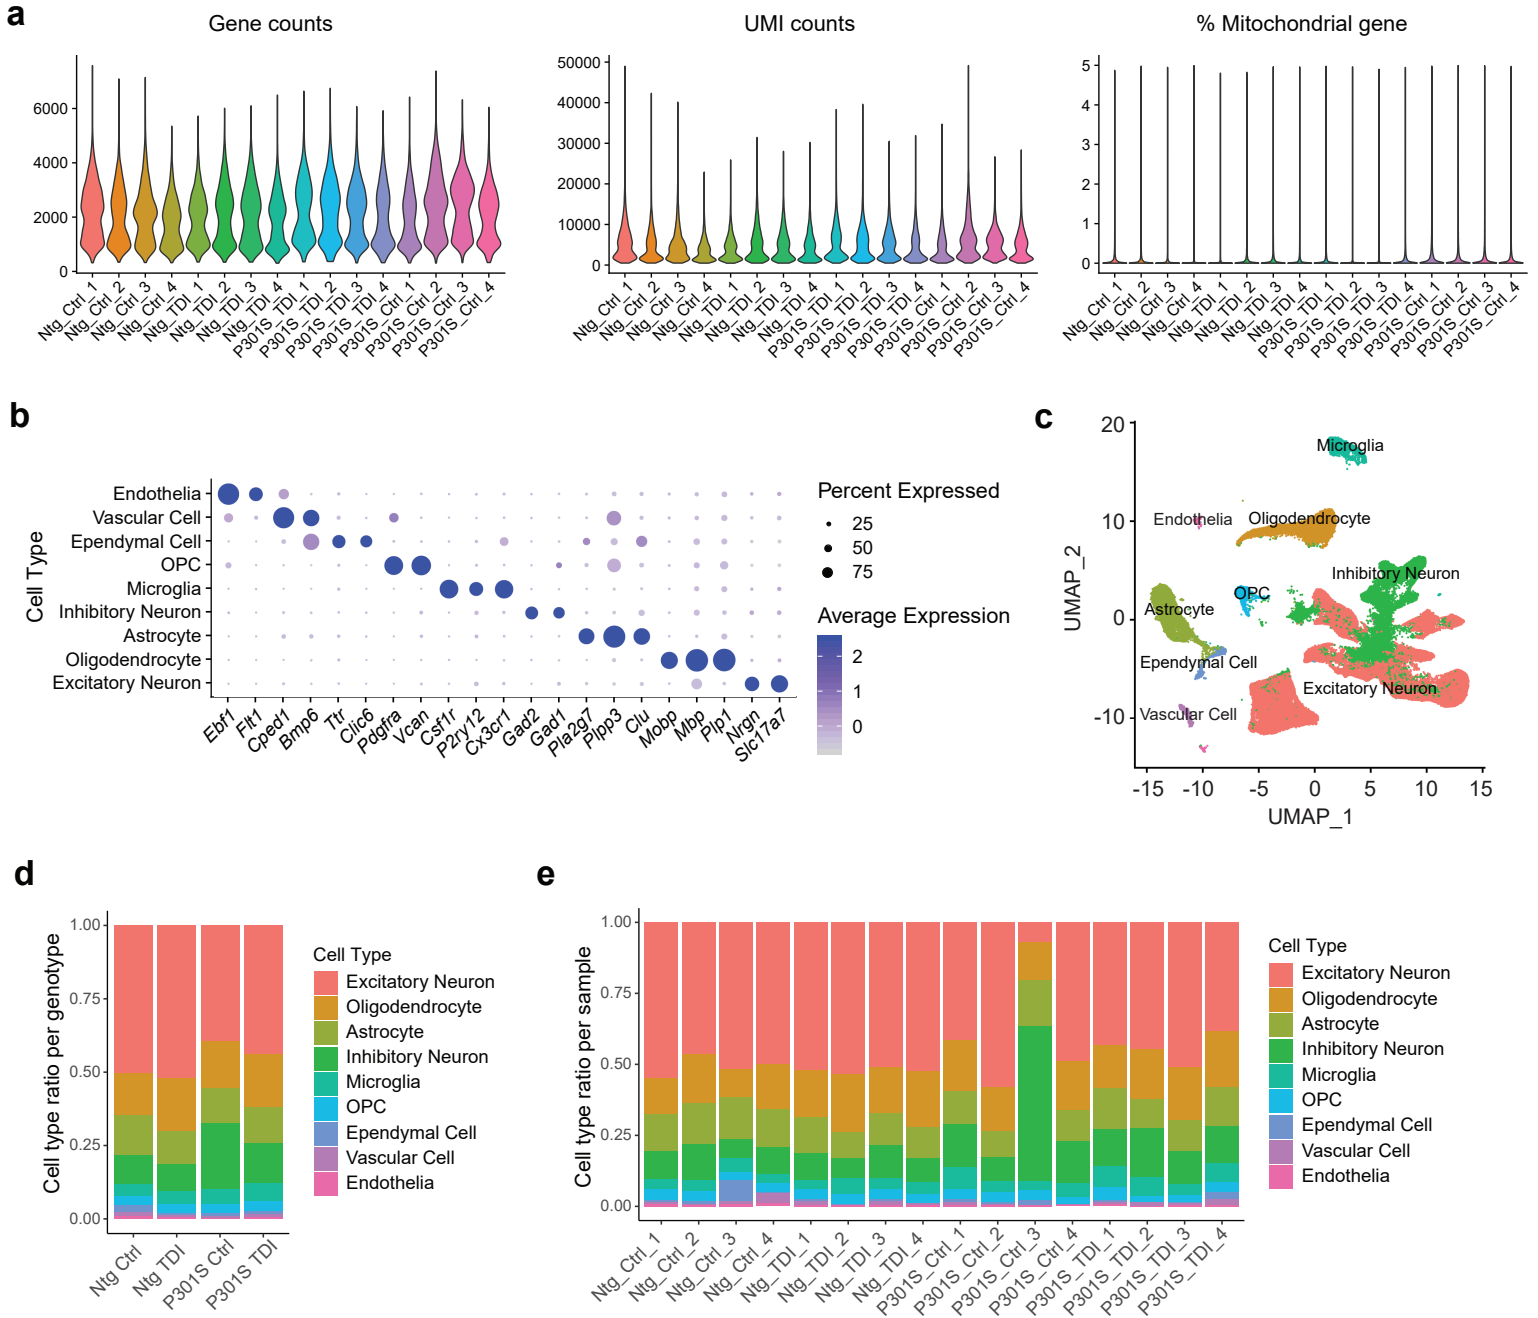

**Supplementary Figure 3 | Quality-control of snRNA-seq of *P301S* hippocampi treated with TDI-6570 (Related to Figure 7).** **a.** Quality-control plots showing equivalent amounts of total number of genes, total number of molecules, and percent mitochondrial RNA in nuclei used for downstream analyses. **b.** Summary of genes used for cluster classification into different cell types. **c.** UMAP dimensional plot showing nuclei colored according to transcriptionally distinct cell clusters identified using Seurat package. **d–e.** Proportion of each cell type detected across the different genotypes (d) and each mouse (e). P301S\_Ctrl\_3 is an outlier thus removed from downstream analyses.
